# Supplementary material for: Robust synthesis of highly charged superparamagnetic Fe3O4 colloidal nanocrystal clusters for magnetically responsive photonic crystals
Source: Royal Society of Chemistry journal article supplement (doi:10.1039/d1nj02582a), 2021-01-01
Supplement: d1nj02582a1.pdf [file d1nj02582a1.pdf]

## Supporting Information

### **Robust Synthesis of Highly Charged Superparamagnetic Fe<sub>3</sub>O<sub>4</sub> Colloidal Nanocrystal Clusters for Magnetically Responsive Photonic Crystals**

Liting Pan,<sup>#1</sup> Zhuo Peng,<sup>#1</sup> Hairong Yu,<sup>1</sup> Ting Liang<sup>1</sup> and Changjing Cheng,<sup>\*1,2</sup>

1. Key Laboratory of Basic Chemistry, the National Ethnic Affairs Commission, No.16 South Section 4, Yihuan Road, Chengdu, Sichuan, 610041, P. R. China. *Email:* chengcj@swun.edu.cn

2. College of Chemistry and Environment, Southwest Minzu University, No.16 South Section 4, Yihuan Road, Chengdu, Sichuan, 610041, P. R. China. *Email:* chengcj@swun.edu.cn

<sup>#</sup>These authors contributed equally to this work.

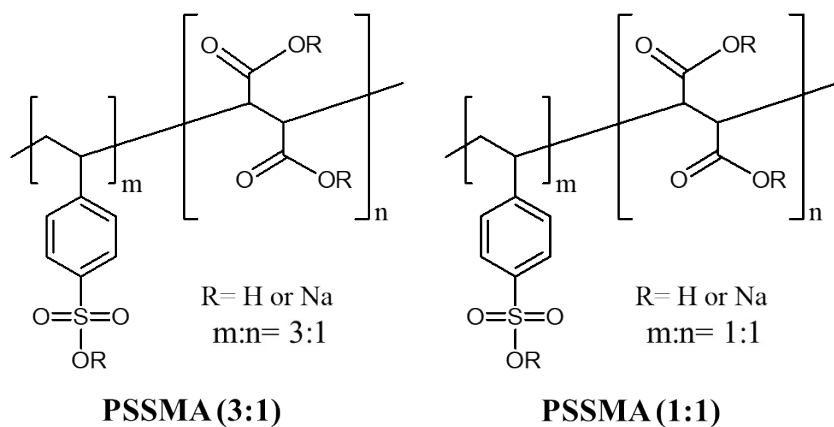

**Fig. S1** The chemical structures of PSSMA (3:1) and PSSMA (1:1).

**Table S1.** Synthesis recipes of the highly charged CNCs in this work.

| Sample               | EG<br>(mL) | PSSMA (3:1)<br>(g) | FeCl <sub>3</sub> ·6H <sub>2</sub> O<br>(g) | NaAc·3H <sub>2</sub> O<br>(g) | Molar ratio of<br>Ac <sup>-</sup> /Fe <sup>3+</sup> |
|----------------------|------------|--------------------|---------------------------------------------|-------------------------------|-----------------------------------------------------|
| CNCs0.5              | 40         | 0.5                | 1.080                                       | 3.0                           | 5.5                                                 |
| CNCs1.0              | 40         | 1.0                | 1.080                                       | 3.0                           | 5.5                                                 |
| CNCs1.5              | 40         | 1.5                | 1.080                                       | 3.0                           | 5.5                                                 |
| CNCs2.0              | 40         | 2.0                | 1.080                                       | 3.0                           | 5.5                                                 |
| CNCs2.5              | 40         | 2.5                | 1.080                                       | 3.0                           | 5.5                                                 |
| CNCs3.0              | 40         | 3.0                | 1.080                                       | 3.0                           | 5.5                                                 |
| CNCs-5               | 40         | 2.5                | 1.192                                       | 3.0                           | 5                                                   |
| CNCs-6               | 40         | 2.5                | 0.993                                       | 3.0                           | 6                                                   |
| CNCs-8               | 40         | 2.5                | 0.745                                       | 3.0                           | 8                                                   |
| CNCs-10<br>(CNCs-1X) | 40         | 2.5                | 0.596                                       | 3.0                           | 10                                                  |
| CNCs-12              | 40         | 2.5                | 0.497                                       | 3.0                           | 12                                                  |
| CNCs-2X              | 80         | 5                  | 1.192                                       | 6.0                           | 10                                                  |
| CNCs-5X              | 200        | 12.5               | 2.98                                        | 15.0                          | 10                                                  |
| CNCs-10X             | 400        | 25                 | 5.96                                        | 30.0                          | 10                                                  |
| CNCs-20X             | 800        | 50                 | 11.92                                       | 60.0                          | 10                                                  |

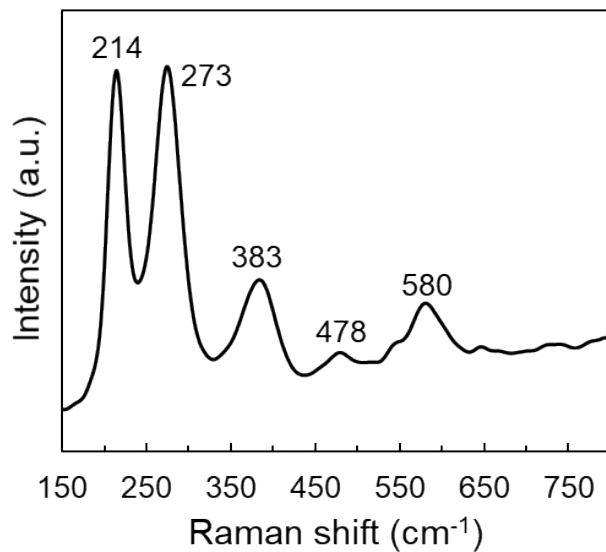

**Fig. S2** Raman scattering spectrum of 131-nm CNCs with a laser power of 10 mW.

Upon increasing the laser power from 1 to 10 mW, two typical peaks at 214 and 273  $\text{cm}^{-1}$  assigned to  $\alpha\text{-Fe}_2\text{O}_3$  were observed, indicating that the magnetite ( $\text{Fe}_3\text{O}_4$ ) was transformed into hematite ( $\alpha\text{-Fe}_2\text{O}_3$ ) because of the local heating induced oxidation from laser irradiation.<sup>1</sup>

**Table S2.**  $\zeta$  potentials of CNCs synthesized with PSSMA (3:1), PSSMA (1:1) and PSS as the ligands.

| Sample           | Ligand      | $\zeta$ potential (mV) |
|------------------|-------------|------------------------|
| CNCs-PSSMA (3:1) | PSSMA (3:1) | -51.0 $\pm$ 1.3        |
| CNCs-PSSMA (1:1) | PSSMA (1:1) | -26.6 $\pm$ 1.5        |
| CNCs-PSS         | PSS         | -20.2 $\pm$ 2.5        |

Note: The CNCs were synthesized by using 2.5 g of PSSMA (3:1) for CNCs-PSSMA (3:1), of PSSMA (1:1) for CNCs-PSSMA (1:1), and of PSS for CNCs-PSS, while keeping other conditions unchanged (0.596 g of FeCl<sub>3</sub>·6H<sub>2</sub>O and 3.0 g of NaAc·3H<sub>2</sub>O in 40 mL of EG for 10 h at 200 °C).

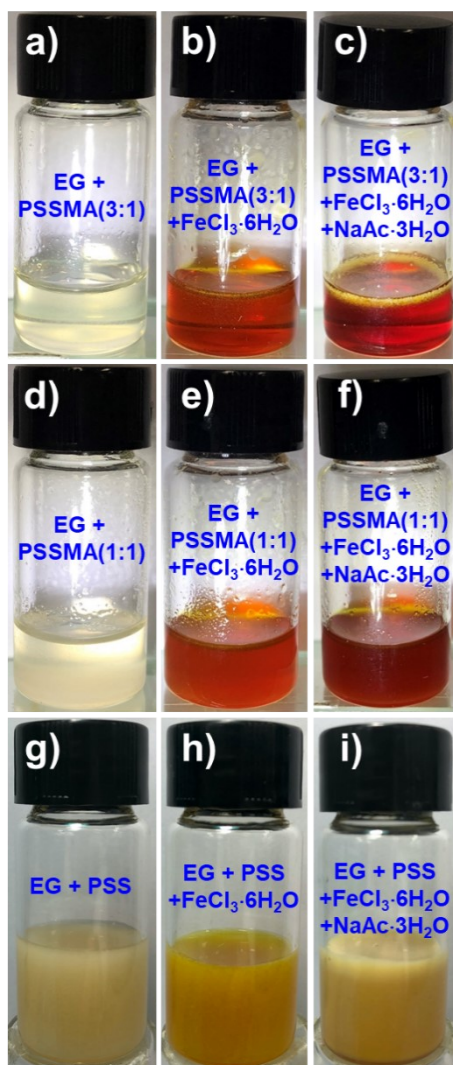

**Fig. S3** Digital pictures of the reaction mixtures dissolved different ligands: PSSMA (3:1) (a-c), PSSMA (1:1) (d-f), and PSS (g-i).

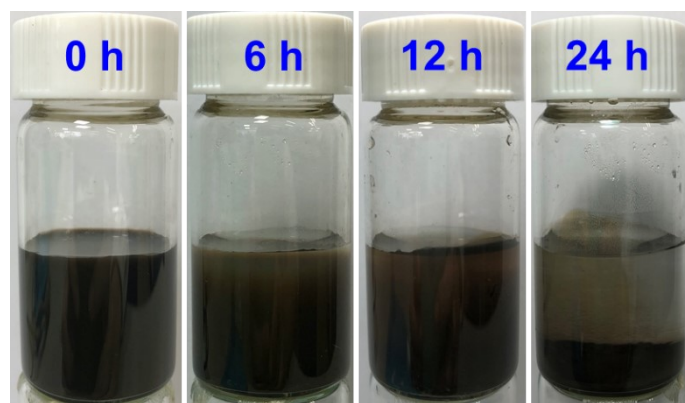

**Fig. S4** Digital pictures of PSS-stabilized CNCs (CNCs-PSS) in water after storing different time.

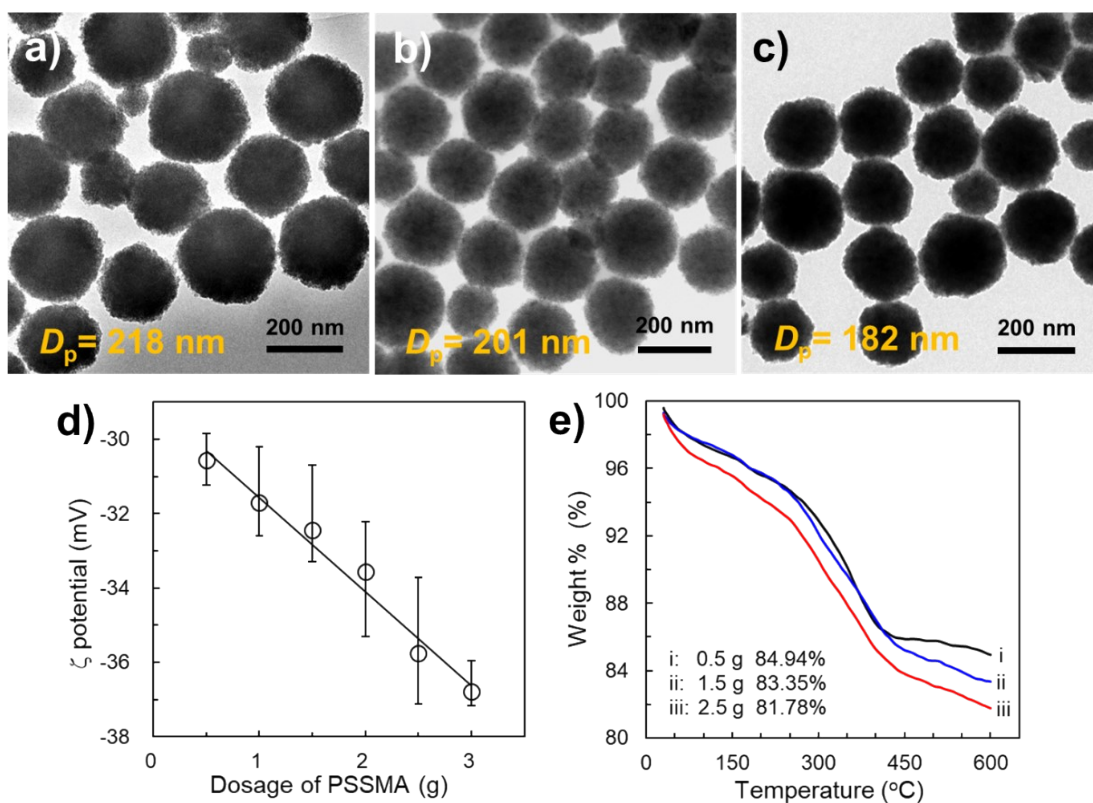

**Fig. S5** (a-c) TEM images, (d)  $\zeta$  potentials, and (e) TGA curves of CNCs synthesized with different dosages of PSSMA (3:1), while keeping other conditions unchanged (1.08 g of  $\text{FeCl}_3 \cdot \text{H}_2\text{O}$  and 3.0 g of  $\text{NaAc} \cdot 3\text{H}_2\text{O}$  were in 40 mL of EG for 10 h at 200 °C). The average sizes were obtained by measuring over 100 particles for each sample.

In TGA graph, the weight loss at temperature of 30-210 °C is ascribed to the evaporation of the adsorbed water on the particles, the decomposition of the bound PSSMA (3:1) at 210-430 °C, and the gradual oxidation of  $\text{Fe}_3\text{O}_4$  into  $\alpha\text{-Fe}_2\text{O}_3$  at temperature over  $\sim 430$  °C.



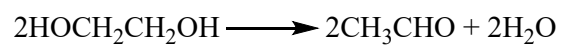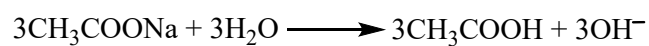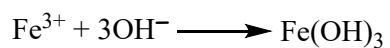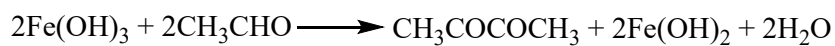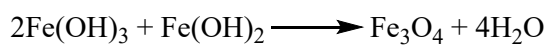

**Fig. S6** The formation process of primary magnetite ( $\text{Fe}_3\text{O}_4$ ) nanocrystals.

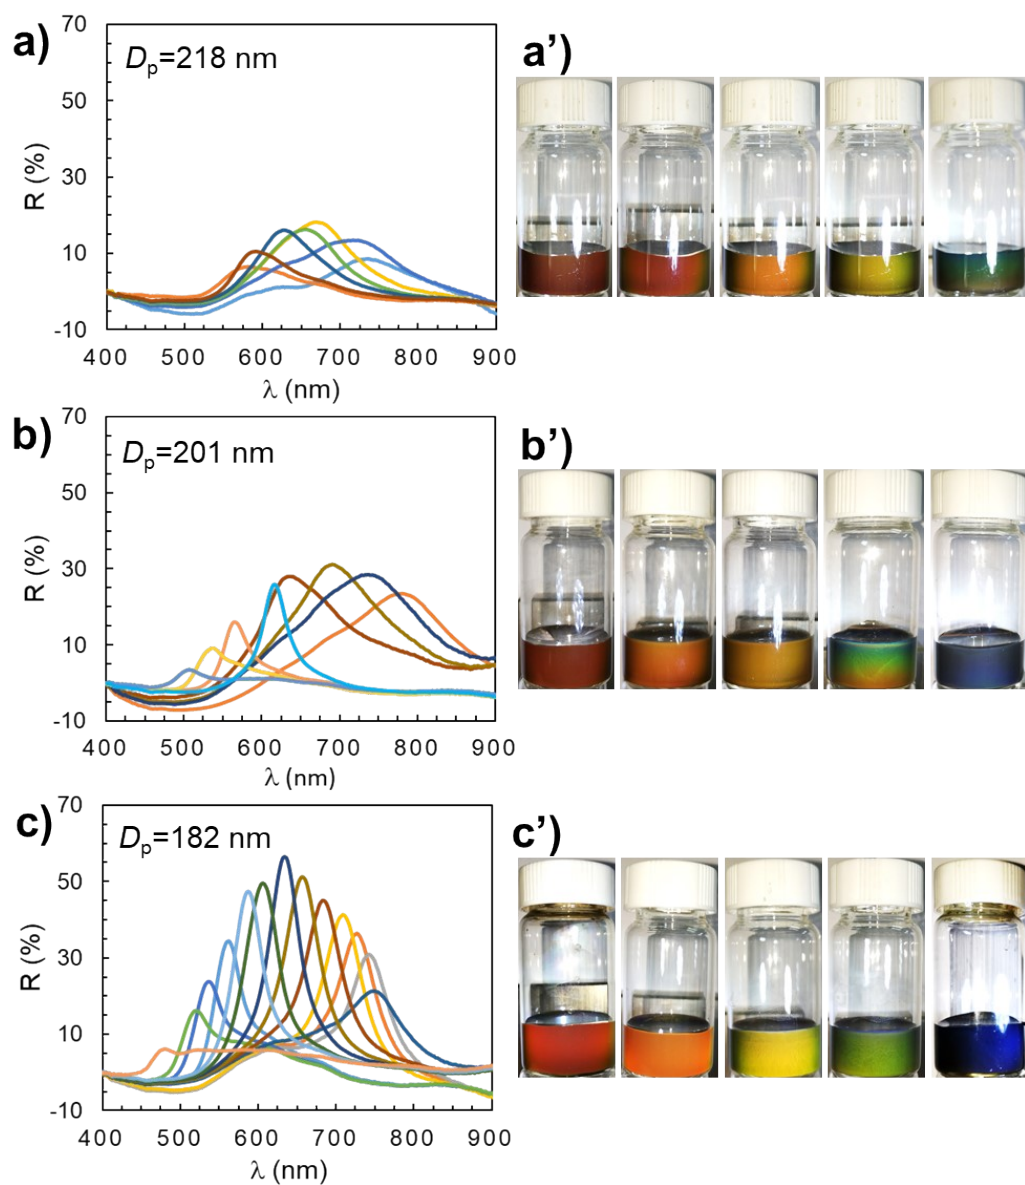

**Fig. S7** Reflection spectra (a-c) and digital pictures (a'-c') of aqueous dispersions of CNCs synthesized with PSSMA (3:1) dosages of (a, a') 0.5 g, (b, b') 1.5 g and (c, c') 2.5 g upon changing the magnet-sample distances from 10.0 to 4.0 cm (a, a'), from 8.5 to 5.0 cm (b, b'), and from 9.5 to 5.0 cm (c, c').

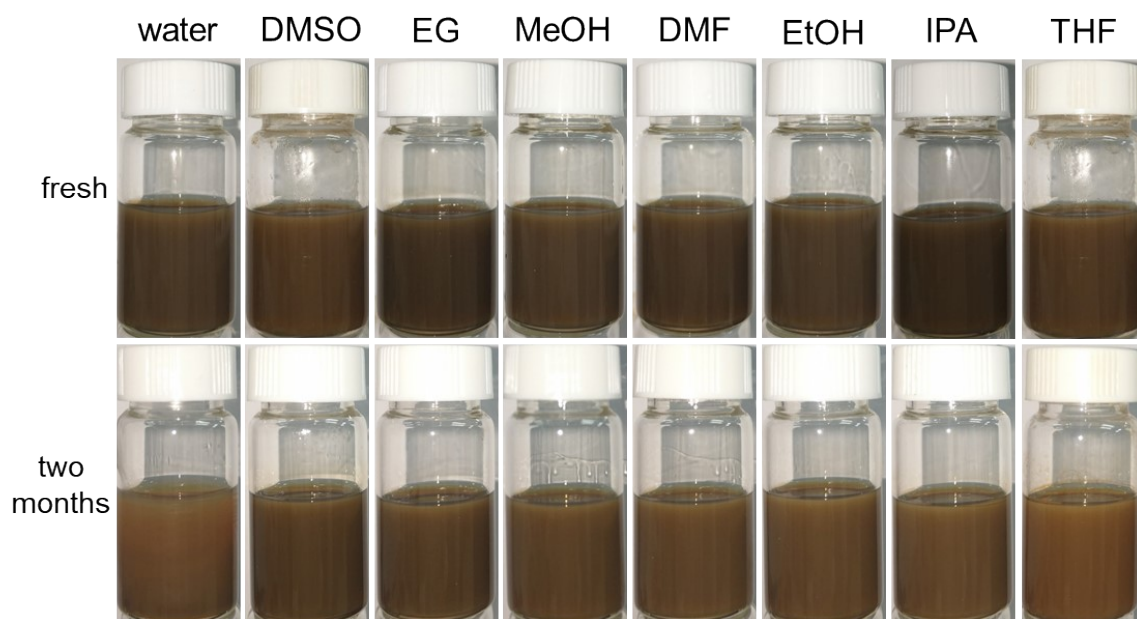

**Fig. S8** Digital pictures of 131-nm CNCs dispersed in various solvents after storing different times.

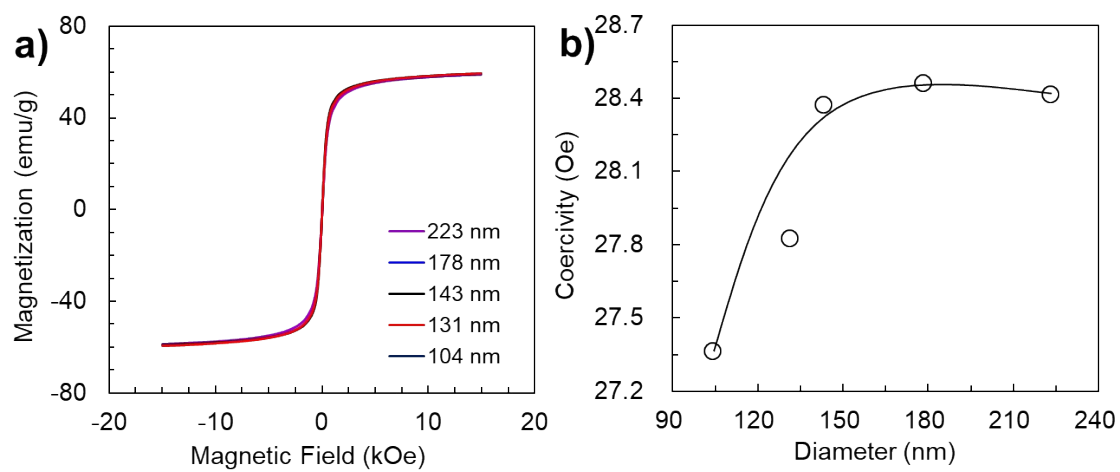

**Fig. S9** Magnetic hysteresis loops (a) and coercivity of the CNCs sample with diameters ranging from 104 to 223 nm.

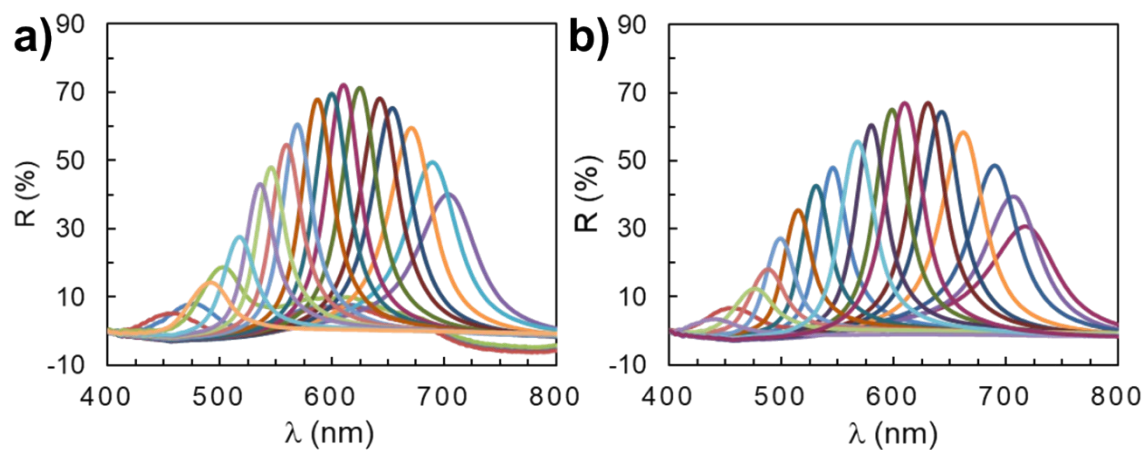

**Fig. S10** Reflection spectra of an aqueous dispersion of 131-nm CNCs upon changing the magnet-sample distances from 7.0 to 3.0 cm (a) and from 3.0 to 7.0 cm (b).

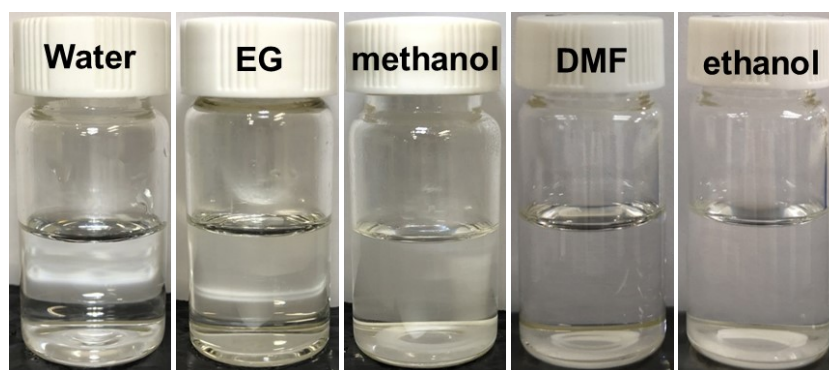

**Fig. S11** Solubility of PSSMA (3:1) in various solvents. The mass content of PSSMA (3:1) in various solvents is 2.5 mg/mL.

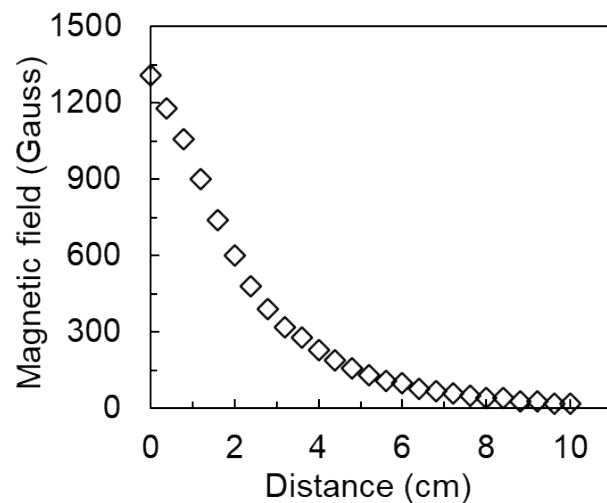

**Fig. S12** Spatial distribution of the magnetic field strength measured by using a Hall probe.

## Reference

1. D. L. A. de Faria, S. V. Silva and M. T. de Oliveira, *J. Raman Spectrosc.*, 1997, **28**, 873-878.
